# Supplementary material for: A novel YOLOv11 framework for enhanced tomato disease detection
Source: PeerJ journal article supplement (doi:10.7717/peerj-cs.3200), 2025-10-30
Supplement: SupplementalTable_2StaffSLW.docx [file SupplementalTable_2StaffSLW.docx]

| Release | Year | Tasks Supported | Key Contributions | Framework |
| --- | --- | --- | --- | --- |
| YOLOv1 | 2015 | Object Detection, Basic Classification | Single-stage object detection | Darknet |
| YOLOv2 | 2016 | Object Detection, Improved Classification | Multi-scale training, dimension clustering | Darknet |
| YOLOv3 | 2018 | Object Detection, Multi-scale Detection | SPP block, Darknet-53 backbone | Darknet |
| YOLOv4 | 2020 | Object Detection, Basic Object Tracking | Mish activation, CSPDarknet-53 backbone | Darknet |
| YOLOv5 | 2020 | Object Detection, Basic Instance Segmentation | Anchor-free detection, SWISH activation | PyTorch |
| YOLOv6 | 2022 | Object Detection, Instance Segmentation | Self-attention, anchor-free detection | PyTorch |
| YOLOv7 | 2022 | Object Detection, Object Tracking, Instance Segmentation | Transformers, E-ELAN reparameterization | PyTorch |
| YOLOv8 | 2023 | Object Detection, Instance Segmentation | GANs, anchor-free detection | PyTorch |
| YOLOv9 | 2024 | Object Detection, Instance Segmentation | Consistent dual assignments for NMS-free training | PyTorch |
| YOLOv10 | 2024 | Object Detection | Darknet | PyTorch |
| YOLOv11 | **2024** | **Object Detection, Instance Segmentation, Pose Estimation, Oriented Object Detection** | **C3k2 block, C2PSA spatial attention, enhanced feature extraction, reduced parameter count** | **PyTorch** |
