# Supplementary material for: A novel YOLOv11 framework for enhanced tomato disease detection
Source: PeerJ journal article supplement (doi:10.7717/peerj-cs.3200), 2025-10-30
Supplement: TableS1refs.docx [file TableS1refs.docx]

| Disease Name (Abbreviation) | Pathogen Type | Scientific Name | Optimal Conditions | Primary Symptoms | Secondary Symptoms | Affected Plant Parts | Transmission Method | Diagnostic Features | Economic Impact | Management Strategies | References |
| --- | --- | --- | --- | --- | --- | --- | --- | --- | --- | --- | --- |
| Tomato Target Spot (TS) | Fungal | *Corynespora cassiicola* | 28-32°C, >80% RH | Small (1mm) circular lesions with yellow halos | Lesions expand to 10mm, coalesce | Leaves, stems, fruits | Water splash, contaminated tools | Dark concentric rings on lesions | Up to 50% yield loss in severe cases | Fungicides (chlorothalonil), resistant varieties, crop rotation | Abdulridha et al. (2020) [32] |
| Tomato Early Blight (EB) | Fungal | *Alternaria solani* | 24-29°C, humid | Dark necrotic spots (2-5mm) on older leaves | "Bull's-eye" pattern, defoliation | Lower leaves first, then whole plant | Airborne spores, infected debris | Concentric rings with yellow halo | 20-50% yield reduction | Strobilurin fungicides, proper spacing, remove debris | Chaerani & Voorrips (2006) [33] |
| Tomato Late Blight (LB) | Oomycete | *Phytophthora infestans* | 10-24°C, wet | Water-soaked lesions | White sporulation underside, rapid necrosis | All aerial parts | Windborne spores, rain splash | Rapid tissue collapse in humidity | Can destroy entire crop in days | Metalaxyl-based fungicides, avoid overhead irrigation | Soylu et al. (2006) [34] |
| Tomato Leaf Mold (LM) | Fungal | *Passalora fulva* (formerly *Cladosporium fulvum*) | 22-25°C, >85% RH | Yellow upper leaf spots | Velvety olive-green mold underneath | Leaves, occasionally stems | Air currents, contaminated structures | Distinct color difference leaf surfaces | Significant in greenhouse production | Reduce humidity, improve air circulation | Zhao et al. (2022) [35] |
| Tomato Gray Leaf Spot (GS) | Fungal | *Stemphylium spp.* | 24-27°C, humid | Tiny brown specks (1mm) | Lesions turn gray with yellow halos | Older leaves first | Splashing water, infected tools | Brittle texture of infected leaves | Up to 40% defoliation | Copper fungicides, resistant cultivars | Mersha et al. (2014) [36] |
| Tomato Black Mold (BM) | Fungal | *Pseudocercospora fuligena* | >25°C, high RH | Pale yellow lesions | Sooty black fungal growth | Mature leaves | Wind, rain splash | Black powdery spore masses | Cosmetic damage to fruit | Sulfur sprays, avoid wounding | Jones et al. (2001) [37] |
| Tomato Powdery Mildew (PM) | Fungal | *Oidium neolycopersici* | 20-27°C, moderate RH | White powdery patches | Leaf curling, premature senescence | Leaves, petioles | Airborne conidia | Flour-like appearance on leaves | Reduced fruit size and quality | Bicarbonate sprays, resistant varieties | Parker et al. (1997) [38] |
| Tomato Septoria Leaf Spot (SLS) | Fungal | *Septoria lycopersici* | 20-25°C, wet | Circular spots (2-5mm) with dark margins | Centers turn gray, pycnidia visible | Lower leaves upward | Rain splash, contaminated soil | Tiny black fruiting bodies in lesions | Complete defoliation possible | Chlorothalonil, avoid leaf wetness | Broadbent (1976) [39] |
| Tomato Mosaic Disease (MD) | Viral | *Tomato mosaic virus (ToMV)* | 16-28°C | Light/dark green mosaic | Leaf distortion, stunting | Entire plant | Mechanical, seed-borne | Fern-leaf distortion in severe cases | Global 20% production loss | Virus-free seed, disinfect tools | Moriones & Navas-Castillo (2000) [40] |
| Tomato Yellow Leaf Curl Virus (YLCV) | Viral | *Begomovirus* spp. | 33-39°C | Upward leaf curling | Stunting, flower abortion | New growth | Whitefly (*Bemisia tabaci*) | Severe cupping of leaflets | Up to 100% loss in epidemics | Reflective mulches, insecticides | Fiallo-Olivé & Navas-Castillo (2019) [41] |
| Tomato Bacterial Spot (BS) | Bacterial | *Xanthomonas spp.* | 24-30°C, wet | Small water-soaked spots | Scorched appearance, defoliation | All above-ground parts | Rain, irrigation, tools | Angular lesions limited by veins | 66% yield loss possible | Copper bactericides, windbreaks | Jones et al. (2004) [42] |
| Tomato Spider Mite (SM) | Arachnid | *Tetranychus urticae* | 29-35°C, dry | Stippling on upper leaf surface | Webbing, bronzing | Leaves | Wind, equipment | Visible mites (0.5mm) with webbing | Reduced photosynthesis | Miticides, predatory mites | Kant et al. (2004) [43] |
| Tomato Leaf Miner (LMN) | Insect | *Tuta absoluta* | 20-30°C | Serpentine leaf mines | Frass visible in tunnels | Leaves, stems | Flight (adults), trade | Clear windows in leaf epidermis | 80-100% loss untreated | Pheromone traps, spinosad | Xu et al. (2007) [44] |

[32] Abdulridha J, Ampatzidis Y, Kakarla SC, Roberts P. Detection of target spot and bacterial spot diseases in tomato using UAV-based and benchtop-based hyperspectral imaging techniques. Precision Agric 2020;21:955–78. https://doi.org/10.1007/s11119-019-09703-4.

[33] Chaerani R, Voorrips RE. Tomato early blight (Alternaria solani): the pathogen, genetics, and breeding for resistance. J Gen Plant Pathol 2006;72:335–47. https://doi.org/10.1007/s10327-006-0299-3.

[34] Soylu EM, Soylu S, Kurt S. Antimicrobial Activities of the Essential Oils of Various Plants against Tomato Late Blight Disease Agent Phytophthora infestans. Mycopathologia 2006;161:119–28. https://doi.org/10.1007/s11046-005-0206-z.

[35] Zhao, T., Pei, T., Jiang, J., Yang, H., Zhang, H., Li, J., & Xu, X. Understanding the mechanisms of resistance to tomato leaf mold: A review. Horticultural Plant Journal 2022;8:667–75. https://doi.org/10.1016/j.hpj.2022.04.008.

[36] Mersha Z, Zhang S, Hau B. Effects of temperature, wetness duration and leaf age on incubation and latent periods of black leaf mold (Pseudocercospora fuligena) on fresh market tomatoes. Eur J Plant Pathol 2014;138:39–49. https://doi.org/10.1007/s10658-013-0295-3.

[37] Jones H, Whipps JM, Gurr SJ. The tomato powdery mildew fungus Oidium neolycopersici. Mol Plant Pathol 2001;2:303–9. https://doi.org/10.1046/j.1464-6722.2001.00084.x.

[38] Parker SK, Nutter FW, Gleason ML. Directional Spread of Septoria Leaf Spot in Tomato Rows. Plant Disease 1997;81:272–6. https://doi.org/10.1094/PDIS.1997.81.3.272.

[39] Broadbent L. Epidemiology and Control of Tomato Mosaic Virus. Annual Review of Phytopathology 1976;14:75–96. https://doi.org/10.1146/annurev.py.14.090176.000451.

[40] Moriones E, Navas-Castillo J. Tomato yellow leaf curl virus, an emerging virus complex causing epidemics worldwide. Virus Research 2000;71:123–34. https://doi.org/10.1016/S0168-1702(00)00193-3.

[41] Fiallo-Olivé E, Navas-Castillo J. Tomato chlorosis virus, an emergent plant virus still expanding its geographical and host ranges. Molecular Plant Pathology 2019;20:1307–20. https://doi.org/10.1111/mpp.12847.

[42] Jones JB, Lacy GH, Bouzar H, Stall RE, Schaad NW. Reclassification of the Xanthomonads Associated with Bacterial Spot Disease of Tomato and Pepper. Systematic and Applied Microbiology 2004;27:755–62. https://doi.org/10.1078/0723202042369884.

[43] Kant MR, Ament K, Sabelis MW, Haring MA, Schuurink RC. Differential Timing of Spider Mite-Induced Direct and Indirect Defenses in Tomato Plants. Plant Physiol 2004;135:483–95. https://doi.org/10.1104/pp.103.038315.

[44] Xu HR, Ying YB, Fu XP, Zhu SP. Near-infrared Spectroscopy in Detecting Leaf Miner Damage on Tomato Leaf. Biosystems Engineering 2007;96:447–54. https://doi.org/10.1016/j.biosystemseng.2007.01.008.
